# Supplementary material
Source: PubMed Central journal article supplement (PMC10991133)
Supplement: 262_2021_2966_MOESM1_ESM.pdf [file 262_2021_2966_MOESM1_ESM.pdf]

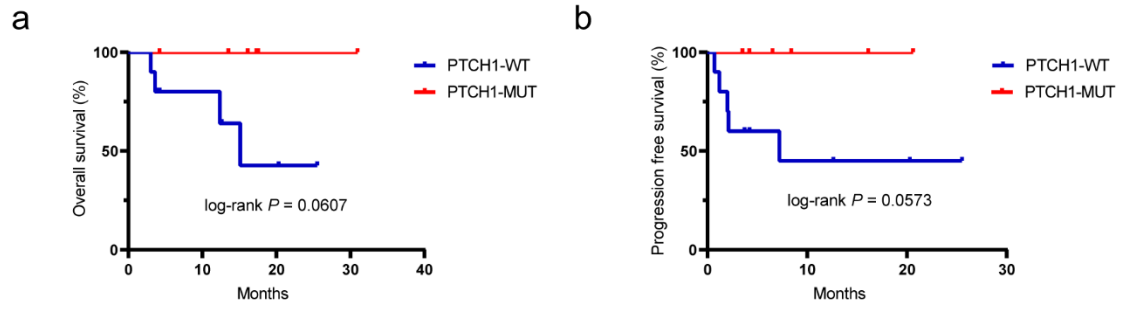

**Fig. S1** Kaplan-Meier survival curves of OS (a) and PFS (b) comparing *PTCH1* wild-type and *PTCH1* mutation patients in the MSI-H populations of our cohort.
