# Supplementary material
Source: PubMed Central journal article supplement (PMC10991133)
Supplement: 262_2021_2966_MOESM2_ESM.pdf [file 262_2021_2966_MOESM2_ESM.pdf]

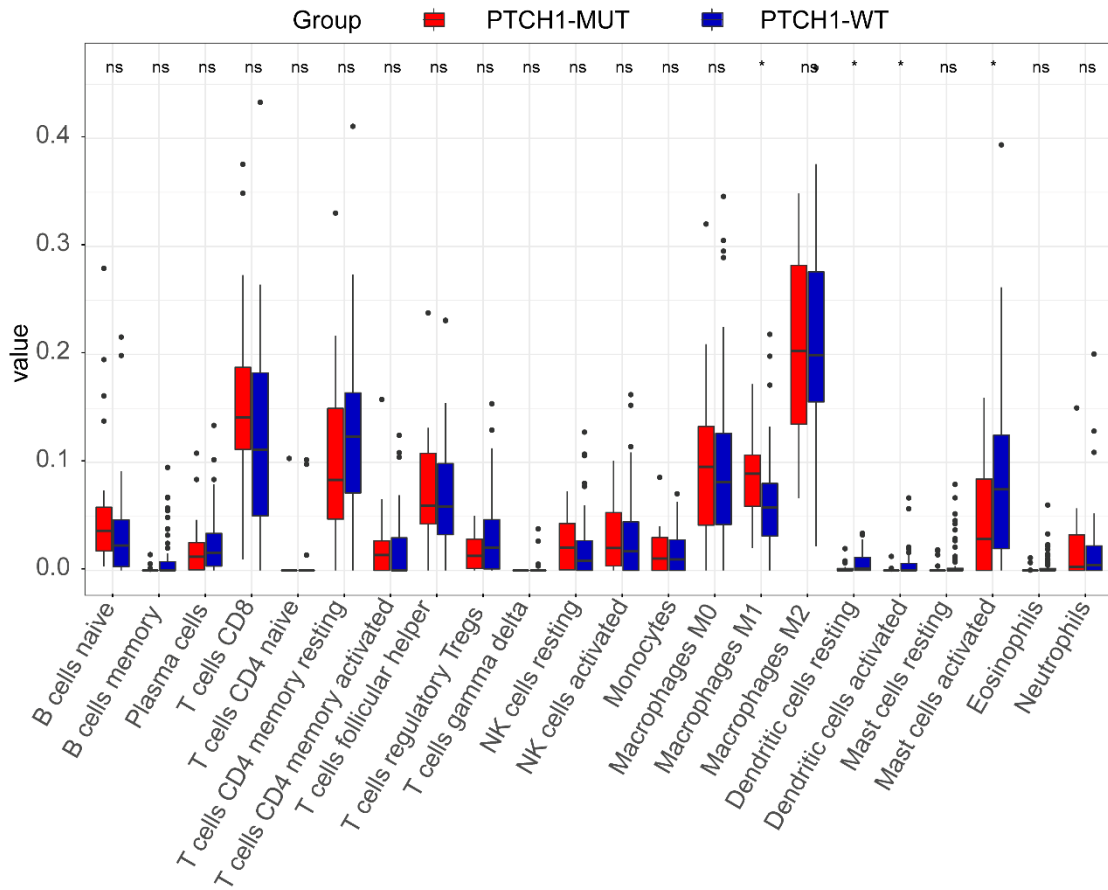

**Fig.S2** The boxplot shows the abundance of CIBERSORT-derived immune cells in multiple cell subsets based on *PTCH1* status in the TCGA cohort.
